# Supplementary material for: Establishing the national top 10 priority research questions to improve diabetes-related foot health and disease: a Delphi study of Australian stakeholders
Source: HighWire-hosted journal article supplement (doi:10.1136/bmjdrc-2021-002570), 2021-11-01
Supplement: bmjdrc-2021-002570supp002_data_supplement.pdf [file bmjdrc-2021-002570supp002_data_supplement.pdf]

Supplementary Table 2: Number of questions per DFD category after Rounds 1 and 3

| Diabetes-related foot health and disease category | Number (%) of questions after Round 1 | Number (%) of questions after Round 3 |           |                      |
|---------------------------------------------------|---------------------------------------|---------------------------------------|-----------|----------------------|
|                                                   | Overall sample                        | Overall Sample                        | Consumers | Health professionals |
| Health Services                                   | 36 (15.9)                             |                                       |           | 1 (10)               |
| Psychosocial or behavioural                       | 26 (11.5)                             |                                       |           |                      |
| Education                                         | 17 (7.5)                              | 1 (10)                                | 1 (10)    | 1 (10)               |
| Infection                                         | 16 (7.0)                              | 1 (10)                                |           | 2 (20)               |
| Charcot Neuro-osteoarthropathy                    | 13 (5.8)                              |                                       |           |                      |
| Prevention                                        | 12 (5.3)                              |                                       |           |                      |
| Nutrition                                         | 12 (5.3)                              | 1 (10)                                |           |                      |
| Peripheral neuropathy                             | 10 (4.4)                              | 2 (20)                                | 3 (30)    |                      |
| Amputation                                        | 10 (4.4)                              |                                       |           |                      |
| Assessment/diagnosis                              | 10 (4.4)                              |                                       | 2 (20)    |                      |
| Management                                        | 10 (4.4)                              |                                       | 1 (10)    |                      |
| Epidemiology                                      | 8 (3.5)                               |                                       |           | 1 (10)               |
| Aboriginal and Torres Strait Islander health      | 7 (3.1)                               |                                       |           | 1 (10)               |
| Peripheral arterial disease                       | 6 (2.7)                               |                                       | 1 (10)    |                      |
| Blood Glucose Management                          | 6 (2.7)                               |                                       |           |                      |
| Exercise                                          | 6 (2.7)                               | 2 (20)                                | 2 (20)    |                      |
| Offloading                                        | 5 (2.2)                               |                                       |           | 1 (10)               |
| Wound Healing Interventions                       | 4 (1.8)                               |                                       |           |                      |
| Technology                                        | 4 (1.8)                               | 1 (10)                                |           |                      |
| Translational research                            | 4 (1.8)                               |                                       |           | 1 (10)               |
| Mortality                                         | 2 (0.9)                               |                                       |           |                      |
| Economics                                         | 2 (0.9)                               | 2 (20)                                |           | 2 (20)               |

Note: Ordered according to number of responses after Round 1
